# Supplementary material
Source: Research Square preprint supplement (doi:10.21203/rs.3.rs-8967858/v1)
Supplement: Supplementary file 1 [file bfbf652230f843d0a8563dfb.docx]

**SUPPLEMENTARY MATERIAL**

**Table 1a**. Hydrochemical parameters in Basement Complex Section of Western Sokoto Basin

| **SN** | **Location** | **LAT** | **LON** | **ALT** | **Temp** | **PH** | **EC** | **TDS** | **DO** | **Tur** | **Zn** | **Cd** | **V** | **Ti** | **Ba** | **Cu** | **Ni** | **As** | **Co** | **Pb** | **Mn** | **Cr** | **Al** |
| --- | --- | --- | --- | --- | --- | --- | --- | --- | --- | --- | --- | --- | --- | --- | --- | --- | --- | --- | --- | --- | --- | --- | --- |
| SP1 | B.Yauri | 10.70 | 4.81 | 230.74 | 36.90 | 9.00 | 442.00 | 208.00 | 6.51 | 81.40 | 5.85 | 0.02 | 12.91 | 20.23 | 1.48 | 0.32 | 0.66 | 6.76 | -0.31 | -8.55 | 232.16 | 1.10 | 46.26 |
| SP2 | Macrin | 10.68 | 4.80 | 230.74 | 39.60 | 8.80 | 1212.00 | 570.00 | 5.16 | 96.30 | 8.32 | -0.01 | 13.58 | 14.81 | 6.52 | 1.67 | 1.55 | 7.18 | -0.08 | -8.35 | 9.57 | 2.07 | 24.46 |
| SP3 | Yadi | 10.78 | 4.80 | 230.74 | 36.30 | 8.50 | 163.00 | 77.00 | 4.40 | 0.00 | 4.22 | 0.02 | 1.69 | 9.53 | 1.41 | 1.07 | 0.59 | 5.59 | -0.22 | -4.47 | 16.97 | 0.96 | 28.11 |
| SP4 | Tondi Tsamiya | 10.91 | 4.76 | 230.74 | 36.70 | 8.00 | 759.00 | 357.00 | 5.10 | 10.30 | 3.02 | 0.03 | 6.82 | 9.29 | 2.46 | 0.44 | 0.25 | 4.27 | -0.15 | -8.20 | 16.92 | 1.28 | 36.93 |
| SP5 | MB. Yauri | 10.75 | 4.78 | 230.74 | 35.00 | 8.00 | 1357.00 | 635.00 | 6.30 | 0.00 | 3.00 | 0.03 | 2.31 | 11.12 | 1.12 | 0.27 | 0.08 | 4.37 | -0.15 | -6.97 | 8.63 | 1.26 | 20.00 |
| SP6 | Baha | 10.81 | 4.74 | 191.62 | 39.40 | 8.00 | 1376.00 | 653.00 | 7.10 | 8.30 | 0.86 | 0.04 | 4.75 | 9.18 | 1.03 | -0.06 | -0.43 | 4.90 | -0.34 | -2.27 | 8.73 | 1.09 | 43.22 |
| SP7 | Fakai 1 | 11.54 | 4.77 | 284.70 | 36.90 | 9.00 | 442.00 | 208.00 | 6.51 | 81.40 | 5.85 | 0.02 | 12.91 | 20.23 | 1.48 | 0.32 | 0.66 | 6.76 | -0.31 | -8.55 | 232.16 | 1.10 | 46.26 |
| SP8 | Fakai 2 | 11.55 | 4.98 | 300.00 | 39.60 | 8.80 | 1212.00 | 570.00 | 5.16 | 96.30 | 8.32 | -0.01 | 13.58 | 14.81 | 6.52 | 1.67 | 1.55 | 7.18 | -0.08 | -8.35 | 9.57 | 2.07 | 24.46 |
| SP9 | Fakai 3 | 11.51 | 5.10 | 327.40 | 36.30 | 8.50 | 163.00 | 77.00 | 4.40 | 0.00 | 4.22 | 0.02 | 1.69 | 9.53 | 1.41 | 1.07 | 0.59 | 5.59 | -0.22 | -4.47 | 16.97 | 0.96 | 28.11 |
| SP10 | Shanga Keri | 11.39 | 4.56 | 225.36 | 37.50 | 8.00 | 668.00 | 314.00 | 2.80 | 0.00 | 0.06 | -0.02 | -9.12 | -37.10 | 0.07 | 1.40 | -0.08 | -13.74 | -0.05 | -7.76 | 3.32 | 0.21 | 5.09 |
| SP11 | S. Garin Bala | 11.38 | 4.57 | 212.59 | 38.10 | 8.00 | 544.00 | 255.00 | 3.00 | 0.00 | 0.04 | -0.03 | -8.55 | -43.02 | 1.12 | 1.65 | -0.05 | 4.00 | 0.01 | -9.36 | 2.63 | 0.14 | 3.90 |
| SP12 | Jajjaye | 11.37 | 4.57 | 210.65 | 37.40 | 8.00 | 768.00 | 361.00 | 2.00 | 42.50 | 0.35 | -0.16 | -3.01 | 14.19 | 0.34 | 1.78 | 0.07 | -13.91 | 0.03 | -7.08 | 2.59 | 0.31 | 5.20 |
| SP13 | T.K Near Bedi | 11.42 | 5.38 | 420.40 | 36.50 | 9.40 | 370.00 | 175.00 | 4.90 | 0.00 | 0.30 | -0.04 | -8.89 | -44.10 | 0.22 | 1.73 | 0.03 | -13.99 | 0.06 | -6.38 | 1.33 | 0.08 | 1.48 |
| SP14 | S. Garin Dabai | 11.48 | 5.21 | 442.70 | 35.70 | 9.30 | 187.00 | 88.00 | 1.70 | 0.00 | 0.14 | -0.05 | -6.39 | -44.82 | 0.16 | 1.87 | 0.03 | -12.45 | 0.12 | -7.16 | 1.46 | 0.06 | 1.46 |
| SP15 | Amanawa | 11.38 | 5.25 | 399.20 | 0.00 | 9.20 | 997.00 | 469.00 | 26.80 | 2.00 | 0.11 | -0.04 | -8.59 | -44.22 | 0.20 | 1.90 | 0.06 | -12.51 | 0.13 | -7.04 | 0.13 | 0.01 | 1.23 |
| SP16 | K/B Tungar. A | 11.43 | 4.49 | 240.34 | 38.40 | 8.00 | 331.00 | 160.00 | 4.70 | 18.60 | 0.27 | -0.03 | -8.66 | -45.27 | 0.13 | 1.89 | 0.05 | -12.49 | 0.10 | -6.75 | 0.78 | 0.08 | 1.50 |
| SP17 | Matsinkai | 11.43 | 4.38 | 272.79 | 36.00 | 8.00 | 644.00 | 304.00 | 5.60 | 6.20 | 0.21 | -0.03 | -8.43 | -45.17 | 0.10 | 1.90 | 0.03 | -12.01 | 0.06 | -6.37 | 0.09 | 0.05 | 1.06 |
| SP18 | Damba | 11.43 | 4.39 | 205.63 | 35.40 | 8.00 | 68.00 | 32.00 | 3.60 | 73.90 | 0.03 | -0.03 | -8.36 | -44.94 | -0.01 | 1.93 | 0.02 | -11.30 | 0.10 | -7.01 | 0.12 | 0.04 | 0.79 |
| SP19 | D>W Gilanko | 11.36 | 5.48 | 416.60 | 36.10 | 8.70 | 163.00 | 77.00 | 4.16 | 0.00 | 0.90 | -0.05 | -14.04 | 0.22 | 0.69 | 35.74 | -0.17 | -14.77 | -0.23 | -0.27 | 4.19 | 0.25 | 8.23 |
| SP20 | Dan Masallaci | 11.31 | 5.48 | 375.90 | 36.90 | 9.10 | 525.00 | 247.00 | 6.17 | 0.00 | 5.28 | 0.05 | -11.33 | -0.24 | 4.12 | 0.10 | -1.58 | -12.40 | -0.38 | -4.75 | 33.27 | 1.22 | 200.70 |
| SP21 | Biki | 11.25 | 5.49 | 380.40 | 36.80 | 8.40 | 278.00 | 131.00 | 2.90 | 0.00 | 1.19 | -0.04 | -11.27 | 5.53 | 2.36 | 0.19 | -0.10 | -15.26 | -0.21 | -2.70 | 7.68 | 0.40 | 80.55 |
| SP22 | Sakaba Yombe | 11.20 | 5.49 | 370.90 | 35.30 | 8.90 | 225.00 | 106.00 | 1.10 | 0.00 | 0.24 | -0.01 | -7.55 | 1.40 | 5.60 | 0.40 | -0.42 | -7.62 | -0.32 | -1.60 | 1.15 | 0.30 | 14.16 |
| SP23 | Hayin boka | 11.24 | 5.46 | 344.80 | 35.30 | 9.20 | 457.00 | 212.00 | 1.80 | 2.00 | 0.42 | 0.00 | -6.07 | 0.60 | 3.81 | 0.41 | -0.28 | -7.64 | -0.19 | -1.92 | 4.25 | 0.67 | 2.51 |
| SP24 | Dirin daji | 11.26 | 5.47 | 368.70 | 35.30 | 8.80 | 219.00 | 103.00 | 5.50 | 0.00 | 0.74 | 0.00 | -1.73 | 1.01 | 0.70 | 0.52 | -0.30 | -7.21 | -0.21 | -1.32 | 6.06 | 0.37 | 0.16 |
| SP25 | M/ Giwa Tazo | 12.14 | 4.38 | 262.50 | 39.30 | 8.00 | 65.00 | 31.00 | 3.28 | 0.00 | 2.35 | -0.08 | -11.10 | -3.62 | 5.93 | 0.06 | 0.01 | -16.44 | -0.03 | -0.37 | 1.11 | 0.12 | 5.28 |
| SP26 | Rafin Guzuma | 12.05 | 4.37 | 288.15 | 37.40 | 8.00 | 119.00 | 56.00 | 3.30 | 0.00 | 1.72 | -0.02 | -13.27 | -137.52 | 32.95 | 0.95 | -0.45 | -12.68 | -0.25 | -4.38 | 9.79 | 0.66 | 166.34 |
| SP27 | Sarandosa | 12.01 | 4.38 | 285.44 | 37.10 | 8.00 | 38.00 | 18.00 | 2.80 | 0.00 | 1.46 | -0.04 | -12.41 | 8.39 | 2.66 | 0.61 | -0.09 | -14.23 | -0.15 | -3.06 | 5.29 | 0.40 | 59.33 |

**NOTE:** Negative Values imply no detection of the heavy metal parameter

**Table 1b.** Hydrochemical parameters in the Sedimentary Section of Western Sokoto Basin

| **SN** | **Location** | **LAT** | **LON** | **ALT** | **Temp** | **PH** | **EC** | **TDS** | **DO** | **Tur** | **Zn** | **Cd** | **V** | **Ti** | **Ba** | **Cu** | **Ni** | **As** | **Co** | **Pb** | **Mn** | **Cr** | **Al** |
| --- | --- | --- | --- | --- | --- | --- | --- | --- | --- | --- | --- | --- | --- | --- | --- | --- | --- | --- | --- | --- | --- | --- | --- |
| SP1 | Balu | 12.052 | 3.967 | 259.071 | 37.50 | 8.00 | 817.00 | 391.00 | 5.40 | 0.00 | 0.03 | -0.04 | -2.96 | -41.14 | 4.08 | 1.81 | 0.19 | -23.24 | 0.10 | -6.07 | 3.68 | 0.17 | 2.50 |
| SP2 | Maidahini | 12.132 | 4.044 | 210.094 | 39.00 | 8.00 | 104.00 | 49.00 | 3.30 | 74.50 | 0.10 | -0.04 | -9.38 | -41.75 | 0.12 | 1.77 | 0.20 | -15.27 | 0.07 | -6.23 | 3.88 | 0.18 | 3.09 |
| SP3 | T. Riskuwa | 12.039 | 4.006 | 216.168 | 34.10 | 8.00 | 376.00 | 177.00 | 4.20 | 3.10 | 0.09 | -0.04 | -9.13 | -41.72 | 0.12 | 1.84 | 0.21 | -20.70 | 0.10 | -5.70 | 3.56 | 0.16 | 3.03 |
| SP4 | Kaiwa | 12.734 | 4.575 | 246.704 | 39.00 | 8.40 | 470.00 | 221.00 | 7.30 | 0.00 | 0.06 | -0.01 | -9.75 | -41.51 | 0.48 | 1.48 | 1.06 | -20.02 | 0.10 | -7.07 | 1.78 | 0.21 | 3.53 |
| SP5 | Bere | 12.633 | 4.458 | 253.988 | 34.90 | 7.90 | 42.00 | 20.00 | 2.00 | 0.00 | 0.07 | -0.05 | -7.50 | -39.73 | 0.63 | 1.58 | 0.28 | -5.69 | 0.10 | -3.49 | 1.03 | 0.19 | 5.93 |
| SP6 | G. Hammani | 12.586 | 4.427 | 233.721 | 32.80 | 9.00 | 2472.00 | 1162.00 | 5.50 | 0.00 | 0.54 | -0.04 | -8.73 | -41.95 | 0.50 | 1.54 | -0.13 | -16.96 | -0.07 | -6.61 | 1.93 | 0.52 | 6.12 |
| SP7 | U. Dikko | 12.332 | 4.220 | 228.417 | 45.50 | 9.40 | 412.00 | 194.00 | 3.40 | 55.20 | 0.13 | -0.02 | -3.19 | -11.86 | 0.26 | 1.48 | 0.27 | -17.88 | 0.06 | -6.57 | 1.52 | 0.14 | 2.08 |
| SP8 | Gayi | 12.328 | 4.119 | 241.494 | 93.80 | 9.00 | 276.00 | 131.00 | 3.70 | 8.00 | 0.08 | -0.03 | -8.58 | -36.75 | 0.37 | 1.54 | 0.10 | -16.12 | -0.03 | -5.82 | 1.55 | 0.14 | 11.33 |
| SP9 | Sabon G. Asarara | 12.279 | 4.133 | 224.636 | 38.80 | 8.50 | 34.00 | 16.00 | 1.70 | 0.00 | 0.07 | -0.03 | -6.94 | -15.08 | 0.14 | 1.51 | -0.05 | -14.63 | 0.03 | -6.50 | 2.19 | 0.14 | 11.13 |
| SP10 | Gwandu K. Kalambaina | 12.494 | 4.641 | 264.694 | 40.40 | 8.80 | 648.00 | 303.00 | 4.30 | 0.00 | 0.09 | -0.01 | -8.98 | -45.39 | 0.10 | 1.96 | 0.04 | -11.42 | 0.09 | -8.94 | 1.03 | 0.06 | 0.92 |
| SP11 | Gwabare | 12.560 | 4.456 | 277.779 | 42.60 | 8.90 | 85.00 | 40.00 | 3.50 | 57.80 | 0.11 | -0.03 | -8.06 | -46.05 | 0.10 | 2.10 | 0.06 | -11.38 | 0.14 | -7.17 | 0.14 | 0.05 | 0.81 |
| SP12 | Malisa | 12.446 | 4.719 | 271.763 | 39.10 | 9.10 | 280.00 | 132.00 | 5.30 | 0.00 | 0.13 | -0.03 | -8.61 | -44.69 | 0.07 | 1.96 | 0.01 | -11.54 | 0.07 | -6.42 | 1.23 | 0.07 | 1.54 |
| SP13 | Dandi Shiko | 11.781 | 3.841 | 215.591 | 34.20 | 8.00 | 425.00 | 200.00 | 2.60 | 29.00 | 0.80 | -0.04 | -7.55 | -133.14 | 2.23 | -0.07 | -0.10 | -14.75 | -0.16 | -4.78 | 8.70 | 0.51 | 85.47 |
| SP14 | Fana | 11.702 | 3.935 | 185.662 | 35.20 | 8.00 | 48.00 | 23.00 | 3.10 | 0.00 | 0.99 | -0.05 | -3.67 | 3.52 | 1.52 | 0.06 | 0.02 | 4.65 | 0.06 | -2.35 | 0.99 | 0.25 | 19.61 |
| SP15 | Rijiyar Maikabi | 11.799 | 3.805 | 225.863 | 34.10 | 8.00 | 395.00 | 185.00 | 3.60 | 4.10 | 0.46 | -0.06 | -3.84 | -0.76 | 0.61 | 0.23 | -0.02 | -14.66 | -0.16 | -1.13 | 0.50 | 0.17 | 9.81 |
| SP16 | Jega Basaura | 12.319 | 4.257 | 251.765 | 33.00 | 8.00 | 31.00 | 15.00 | 2.50 | 0.00 | 4.90 | -0.04 | -12.91 | 1.38 | 0.45 | 0.05 | -0.25 | -14.34 | -0.09 | -0.15 | 4.62 | 0.41 | 8.38 |
| SP17 | Sabon garin zarya | 12.283 | 4.311 | 280.444 | 37.50 | 8.00 | 408.00 | 191.00 | 4.11 | 0.00 | 1.32 | -0.06 | -11.59 | -2.52 | 0.48 | 0.31 | -0.01 | -14.58 | -0.19 | -0.34 | 0.44 | 0.14 | 6.82 |
| SP18 | Langido | 12.313 | 4.267 | 243.362 | 36.50 | 8.00 | 78.00 | 35.00 | 3.27 | 0.00 | 1.40 | -0.04 | -12.67 | 4.46 | 54.10 | -0.03 | -0.33 | -13.78 | -0.28 | -0.49 | 2.84 | 0.94 | 8.85 |
| SP19 | B. Kebbi Huda | 12.392 | 4.305 | 244.749 | 40.20 | 8.30 | 44.00 | 21.00 | 1.60 | 79.20 | 0.99 | -0.03 | -12.18 | 6.18 | 1.14 | -0.03 | -0.31 | -13.52 | -0.04 | -1.64 | 5.40 | 0.59 | 11.49 |
| SP20 | Sabon Garin Goru | 12.399 | 4.199 | 231.733 | 36.90 | 8.40 | 53.00 | 25.00 | 2.00 | 80.50 | 0.07 | -0.03 | -6.94 | -15.08 | 0.14 | 1.51 | -0.05 | -14.63 | 0.03 | -6.50 | 2.19 | 0.14 | 11.13 |
| SP21 | Kardi | 12.415 | 4.281 | 231.733 | 36.90 | 7.60 | 87.00 | 41.00 | 0.01 | 65.30 | 0.94 | -0.04 | -12.33 | -0.42 | 0.73 | 0.50 | -0.27 | -12.96 | -0.30 | -0.91 | 2.58 | 0.27 | 9.66 |
| SP22 | Bagudo kwanar maje | 11.483 | 4.292 | 213.843 | 34.20 | 8.00 | 61.00 | 29.00 | 2.50 | 2.00 | 0.70 | -0.04 | -10.82 | 1.37 | 0.81 | 0.44 | -0.31 | -13.43 | -0.34 | -0.18 | 2.12 | 0.36 | 8.97 |
| SP23 | Kende | 11.526 | 4.256 | 213.843 | 34.20 | 8.00 | 61.00 | 29.00 | 3.40 | 0.00 | 0.43 | -0.05 | -9.65 | -1.33 | 1.19 | 0.51 | -0.01 | -9.31 | -0.17 | -1.53 | 1.46 | 0.17 | 10.44 |
| SP24 | Kwasara | 11.529 | 4.145 | 213.843 | 32.80 | 8.00 | 123.00 | 58.00 | 4.10 | 0.00 | 1.59 | -0.03 | -9.47 | 1.57 | 10.29 | 0.47 | -0.32 | -12.24 | -0.26 | -2.16 | 7.70 | 0.33 | 14.89 |
| SP25 | Arewa Tila | 12.573 | 4.015 | 234.760 | 37.50 | 9.20 | 129.00 | 59.00 | 2.60 | 65.30 | 0.68 | -0.01 | -9.05 | 3.23 | 0.62 | 0.33 | -0.38 | -9.89 | -0.30 | -2.02 | 2.66 | 0.80 | 11.24 |
| 26 | Kwalaye(company) | 12.593 | 3.926 | 270.919 | 43.30 | 8.60 | 42.00 | 21.00 | 3.20 | 14.50 | 1.30 | -0.03 | -2.86 | -1.54 | 1.45 | 0.46 | 0.07 | -10.64 | -0.06 | -0.76 | 2.85 | 0.45 | 5.93 |
| 27 | Kwalaye (Arewa) | 12.579 | 3.894 | 244.155 | 44.70 | 7.50 | 372.00 | 176.00 | 3.40 | 0.01 | 0.53 | -0.01 | -8.75 | 2.31 | 1.87 | 0.29 | -0.36 | -9.32 | -0.13 | -2.47 | 1.62 | 0.38 | 30.03 |

**NOTE:** Negative Values imply no detection of heavy metal parameter, or Below Detection Limits.
